# Supplementary material for: Evaluation of spoligotyping, SNPs and customised MIRU-VNTR combination for genotyping Mycobacterium tuberculosis clinical isolates in Madagascar
Source: PubMed Central journal article supplement (PMC5650158; doi:10.1371/journal.pone.0186088), 2017-10-20
Supplement: pone.0186088.s002.pdf [file pone.0186088.s002.pdf]

| Lineage                        | Name of SNPs       | Name of gene           | Nucleotide position | codon | Nucleotide in H37Rv | AA in H37Rv | Nucleotide in Mutant | AA in Mutant |
|--------------------------------|--------------------|------------------------|---------------------|-------|---------------------|-------------|----------------------|--------------|
| Euro-American (Lineage4)       | <i>katG</i> 463    | <i>katG</i> or Rv1908c | 1389                | 463   | <b>CGG</b>          | Arg         | <b>CTG</b>           | Leu          |
| East-Asian (Lineage2)          | Rv2952_0526n       | Rv2952                 | 526                 | 176   | <b>GGG</b>          | Gly         | <b>AGG</b>           | Arg          |
| Indo-oceanic (Lineage1)        | Rv3221c_0085n      | TB.3 or Rv3221c        | 85                  | 29    | <b>GTC</b>          | Val         | <b>ATC</b>           | Ile          |
| East-African-Indian (Lineage3) | Rv3804c_0012n      | <i>fbpA</i> or Rv3804c | 12                  | 4     | <b>GTT</b>          | Val         | <b>GTC</b>           | Val          |
| TbD1                           | <i>gyrA</i> 1842   | <i>gyrA</i> or Rv0006  | 1842                | 614   | <b>ATT</b>          | Ile         | <b>ATC</b>           | Ile          |
| Bovis-Mada                     | <i>PstS1</i> _1055 | <i>PstS1</i> or Rv0934 | 1055                | 352   | <b>GTT</b>          | Val         | <b>GCT</b>           | Ala          |

**S1 Table. SNPs (n=6) or mutations characteristic of *M. tuberculosis* lineage.** AA: Amino-Acids, SNP: Single Nucleotide Polymorphism, H37Rv: reference strain of *M. tuberculosis*, In bold the nucleotide mutated
