# Supplementary material for: Evaluation of spoligotyping, SNPs and customised MIRU-VNTR combination for genotyping Mycobacterium tuberculosis clinical isolates in Madagascar
Source: PubMed Central journal article supplement (PMC5650158; doi:10.1371/journal.pone.0186088), 2017-10-20
Supplement: pone.0186088.s003.pdf [file pone.0186088.s003.pdf]

| Lineage             | Name of SNPs          | Forward primer_sequence          | Reveres_primer_sequence            | Wild type allele probe          | Mutant allele probe             |
|---------------------|-----------------------|----------------------------------|------------------------------------|---------------------------------|---------------------------------|
| Euro-American       | <i>katG4</i><br>63    | CCGAGATTGCCA<br>GCCTTAAG         | GAAACTAGCTGT<br>GAGACAGTCAAT<br>CC | 6FAM-<br>CCAGATCCTGGC<br>ATC    | VIC-<br>CAGATCCGGGC<br>ATC      |
| East-Asian          | Rv295<br>2_052<br>6n  | CCTTCGATGTTG<br>TGCTCAATGT       | CATGCGGCGATC<br>TCATTGT            | 6FAM-<br>CCCAGGAGGGTA<br>C      | VIC-<br>CCCAGGAAGGT<br>ACT      |
| Indo-oceanic        | Rv322<br>1c_00<br>85n | TGTCAACGAAGG<br>CGATCAGA         | GACCGTCCGGC<br>AGCTT               | 6FAM-<br>ACAAGGGCGACG<br>TC     | VIC-<br>ACAAGGGCGAC<br>ATC      |
| East-African-Indian | Rv380<br>4c_00<br>12  | GCATGGATGCGT<br>TGAGATGA         | CGAGTCGACGCG<br>ACATACC            | 6FAM-<br>AAGAATGCAGCT<br>TGTTGA | VIC-<br>AAGAATGCAGC<br>TTGTCTGA |
| TBD1<br>MADA        | <i>gyrA1</i><br>842   | CCAGCCCGAGG<br>AACGCATCGCCC<br>A | AGCACCAGGTAC<br>GGGGCGTCGG         | 6FAM-<br>TCCAGATTCGCG<br>GCT    | VIC-<br>TCCAGATCCGC<br>GGCT     |
| Bovis_Mada          | Psts1_1055            | CACCGACGGCAA<br>CAAGGCCTC        | TTCACCACCGCG<br>GGCGGCAGCGG<br>CT  | 6-FAM-<br>ACCAGGTTCAATTT<br>CC  | VIC-<br>ACCAGGCTCAT<br>TTCC     |

**S2 Table. Primer and probe sequences for TaqMan SNPs typing assays**
