# Supplementary material for: Evaluation of spoligotyping, SNPs and customised MIRU-VNTR combination for genotyping Mycobacterium tuberculosis clinical isolates in Madagascar
Source: PubMed Central journal article supplement (PMC5650158; doi:10.1371/journal.pone.0186088), 2017-10-20
Supplement: pone.0186088.s004.pdf [file pone.0186088.s004.pdf]

| MIRU - VNTR locus <sup>(a)</sup> | MIRU - VNTR alias <sup>(b)</sup> | Forward primer 5' to 3'       | Reverse primer 5' to 3'       |
|----------------------------------|----------------------------------|-------------------------------|-------------------------------|
| 580                              | MIRU04 (ETR-D)                   | ATTTGATCGGGATGTTGAT           | TCGGTCCCATCACCTTCTTA          |
| 960                              | MIRU10                           | GTTCTTGACCAACTGCAGTCGTCC      | GCCACCTTGGTGATCAGCTACCT       |
| 1644                             | MIRU16                           | TCGGTGATCGGGTCCAGTCCAAGT<br>A | CCCGTCGTGCAGCCCTGGTAC         |
| 2996                             | MIRU26                           | CCCGCCTTCGAAACGTCGCT          | TGGACATAGGCGACCAGGCGAAT<br>A  |
| 3192                             | MIRU31 (ETR-E)                   | ACTGATTGGCTTCATACGGCTTTA      | GTGCCGACGTGTCTTGAT            |
| 802                              | MIRU40                           | GGGTTGCTGGATGACAACGTGT        | GGGTGATCTCGGCGAAATCAGAT<br>A  |
| 424                              | Mtub04                           | GTCCAGGTTGCAAGAGATGG          | GGCATCCTCAACAACGGTAG          |
| 1955                             | Mtub21                           | AGATCCCAGTTGTCGTCGTC          | CAACATCGCCTGGTTCTGTA          |
| 2401                             | Mtub30                           | AGTCACCTTTCCTACCACTCGTAAC     | ATTAGTAGGGCACTAGCACCTCAA<br>G |
| 3690                             | Mtub39                           | AATCACGGTAACTGGGTTGTTT        | GATGCATGTTGACCCGTAG           |
| 2165                             | ETR-A                            | ATTTGATCGGGATGTTGAT           | TCGGTCCCATCACCTTCTTA          |
| 577                              | ETR-C                            | GACTTCAATGCGTTGTTGGA          | GTCTTGACCTCCACGAGTGC          |
| 2163b                            | Qub-11b                          | CGTAAGGGGGATGCGGGAAATAG<br>G  | CGAAGTGAATGGTGGTGGCAT         |
| 4052                             | Qub-26                           | GGCCAGGTCCTTCCCGAT            | AACGCTCAGCTGTCGGAT            |
| 4156                             | Qub415<br>6                      | TGACCACGGATTGCTCTAGT          | GCCGGCGTCCATGTT               |

**S3 Table. 15 loci MIRU-VNTR combination as described by Supply et al, 2006 [10].** <sup>a</sup> Position of the locus in H37rv genome, <sup>b</sup> Name of the locus
