# Supplementary material for: Evaluation of spoligotyping, SNPs and customised MIRU-VNTR combination for genotyping Mycobacterium tuberculosis clinical isolates in Madagascar
Source: PubMed Central journal article supplement (PMC5650158; doi:10.1371/journal.pone.0186088), 2017-10-20
Supplement: pone.0186088.s005.pdf [file pone.0186088.s005.pdf]

| MIRU - VNTR alias                   | ETR A       | ETR B       | ETR C       | ETRD /MIR U04 | ETR E/MIRU 31 | MIRU 02     | MIRU1 0     | MIRU 16     | MIRU 20     | MIRU 23     | MIRU 24     | MIRU 26     | MIRU 27     | MIRU 39     | MIRU 40     | Mtu b04     | Mtub 21     | Mtub 29     | Mtub 30     | Mtub 34     | Mtub 39     | Qub1 1b     | Qub26        | Qub4 156    |
|-------------------------------------|-------------|-------------|-------------|---------------|---------------|-------------|-------------|-------------|-------------|-------------|-------------|-------------|-------------|-------------|-------------|-------------|-------------|-------------|-------------|-------------|-------------|-------------|--------------|-------------|
| MIRU - VNTR locus (unit size in pb) | 2165 (75pb) | 2461 (57pb) | 0577 (58pb) | 0580 (77pb)   | 3192 (53pb)   | 0154 (53pb) | 0959 (53pb) | 1644 (53pb) | 2059 (77pb) | 2531 (53pb) | 2687 (53pb) | 2996 (51pb) | 3007 (53pb) | 4348 (53pb) | 0802 (54pb) | 0424 (51pb) | 1955 (57pb) | 2347 (57pb) | 2401 (58pb) | 3171 (54pb) | 3690 (58pb) | 2163 (69pb) | 4052 (111pb) | 4156 (59pb) |
| Allele                              |             |             |             |               |               |             |             |             |             |             |             |             |             |             |             |             |             |             |             |             |             |             |              |             |
| 1                                   | 247         | 178         | 172         | 176           | 545           | 455         | 535         | 618         | 514         | 607         | <b>447</b>  | 511         | 551         | 593         | <b>407</b>  | 177         | 149         | 179         | 261         | 171         | 225         | 136         | 264          | 563         |
| 2                                   | 322         | 235         | 230         | 253           | 598           | <b>508</b>  | 590         | <b>671</b>  | <b>591</b>  | 661         | 500         | 562         | 604         | <b>646</b>  | 461         | 218         | <b>206</b>  | 238         | <b>319</b>  | 225         | 283         | 205         | 375          | 622         |
| 3                                   | <b>397</b>  | <b>292</b>  | 288         | <b>330</b>    | <b>651</b>    | 561         | <b>643</b>  | 724         | 668         | 714         | 553         | <b>613</b>  | <b>657</b>  | 699         | 515         | <b>269</b>  | 263         | 293         | 377         | <b>279</b>  | 341         | 274         | 486          | <b>681</b>  |
| 4                                   | 472         | 349         | <b>346</b>  | 407           | 704           | 614         | 696         | 777         | 745         | 767         | 606         | 664         | 709         | 752         | 569         | 320         | 320         | 350         | 435         | 333         | 399         | 343         | 597          | 740         |
| 5                                   | 547         | 406         | 404         | 484           | 757           | 667         | 749         | 829         | 822         | 820         | 659         | 715         | 762         | 805         | 623         | 371         | 377         | 407         | 493         | 387         | 457         | <b>412</b>  | <b>708</b>   | 799         |
| 6                                   | 622         | 463         | 462         | 561           | 810           | 720         | 802         | 882         | 873         | <b>873</b>  | 712         | 766         | 815         | 911         | 677         | 422         | 434         | 464         | 551         | 441         | <b>515</b>  | 481         | 819          | 858         |
| 7                                   | 697         | 520         | 520         | 638           | 863           | 773         | 855         | 935         | 976         | 926         | 765         | 817         | 868         | 964         | 731         | 473         | 491         | 521         | 609         | 495         | 573         | 550         | 930          | 917         |
| 8                                   | 772         | 577         | 578         | 715           | 916           | 826         | 908         | 988         |             | 979         | 818         | 868         | 921         |             | 785         | 524         | 548         | 578         | 667         | 549         | 631         | 619         | 1041         |             |
| 9                                   | 847         | 634         | 636         | 792           |               | 879         | 961         | 1041        |             |             | 871         | 919         |             |             | 839         | 575         | 605         | 635         | 725         | 603         | 747         | 688         |              |             |
| 10                                  | 922         | 691         | 684         | 869           |               | 932         | 1013        |             |             |             | 924         |             |             |             | 893         | 626         | 662         | 692         | 783         | 657         |             | 757         |              |             |

**S4 Table. Table showing the amplicon size and corresponding number of units (allele) in the questioned locus (Christophe Sola, 2009; interne communication). In bold the expected size for H37rv**
